# Supplementary material
Source: PubMed Central journal article supplement (PMC4072326)
Supplement: NIHMS592695-supplement-Supplement.pdf [file NIHMS592695-supplement-Supplement.pdf]

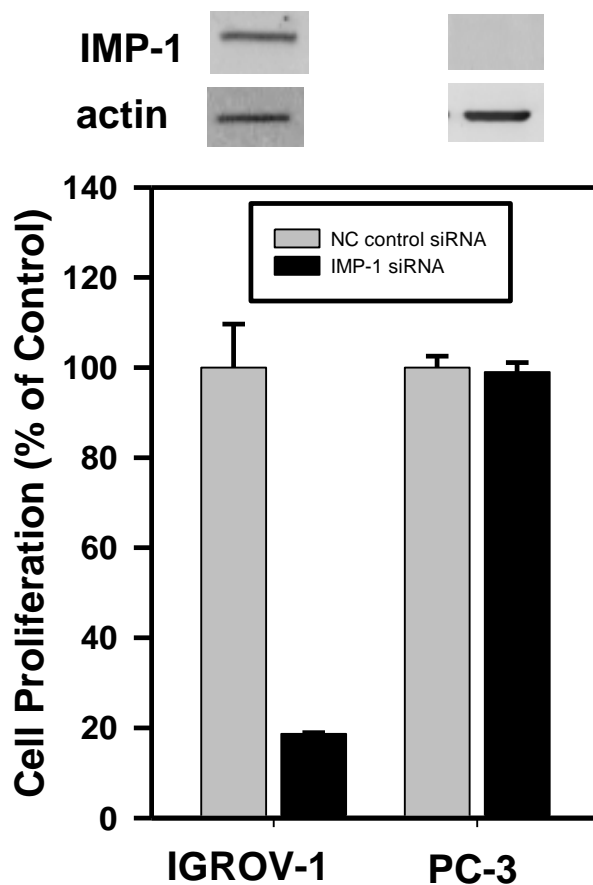

**Supplementary Figure 1.** IMP-1 knockdown inhibits cell proliferation in IMP-1 positive cells. Top: Western blot of IMP-1 positive IGROV-1 ovarian cancer cells and IMP-1 negative PC-3 prostate cancer cells. For each cell line, cell number after transfection with the control non-coding siRNA was set to 100%. The data represents the average  $\pm$  SEM (n=5).

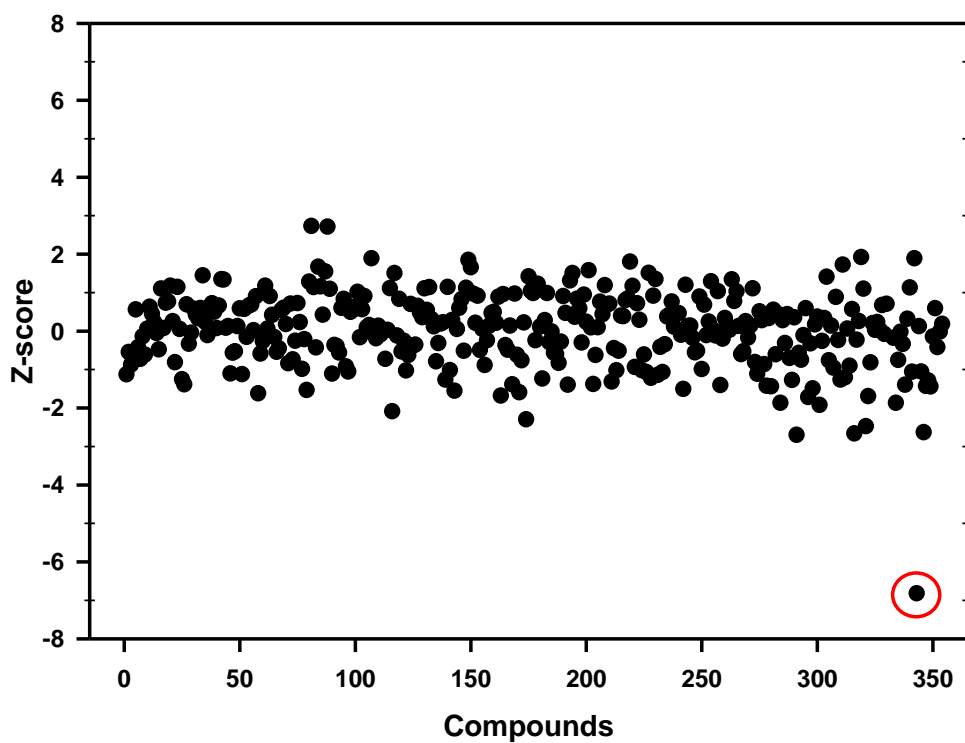

**Supplementary Figure 2.** Scatter plot of Z-scores from the plate containing the lead inhibitor. The lead inhibitor identified from the screen, 6896009 (black dot circled in red) had a Z-score of -6.82 and was clearly differentiated from the other compounds on the plate.
